# Supplementary material for: ANOVA Design for the Optimization of TiO2 Coating on Polyether Sulfone Membranes
Source: PubMed Central journal article supplement (PMC6720000; doi:10.3390/molecules24162924), 2019-08-12
Supplement: molecules-24-02924-s001.pdf [file molecules-24-02924-s001.pdf]

## Appendix:

Table A.1. Materials for making the polymeric membrane

| Material                                     | Molecular Weight | Company                         | Batch Number |
|----------------------------------------------|------------------|---------------------------------|--------------|
| NMP (1-Methyl-2-Pyrrolidone) as Solvent      | 99.13            | Scharlav Chemie S.A.            | MED4942500   |
| DMAc as Solvent                              | 87.12            | Scharlav Chemie S.A.            | -            |
| Isopropanol as non-solvent                   | 60.10            | Ajax Finechem Pty Ltd           | 0809287      |
| Glycerol for post-treatment                  | 92.09            | Ajax Finechem Pty Ltd           | 0810081      |
| PVP40T (Polyvinylpyrrolidone) as pore former | 40000            | Sigma Aldrich                   | 098K0011     |
| Polyethersulfone (PES) as polymer            | 58000 gr/mol     | BASF Co.Ltd                     | Unavailable  |
| Pluronic F 127                               | 2200 Da          | Sigma Aldrich                   | 9003-11-6    |
| IM 22                                        | 82.10            | Sigma Aldrich                   | M50850       |
| PEG                                          | 100              | Sigma Aldrich                   | 25322-68-3   |
| TTIP 97%                                     | 284.22 g/mol     | Sigma Aldrich                   | 546-68-9     |
| BSA(bovine serum albumin)                    | 67               | Morrgate Biotech                | 9048-46-8    |
| Ethanol (anhydrous)                          | -                | Ajax Finechem Pty Ltd           | A4503        |
| Perchloric acid                              | -                | G. Frederick Smith Chemical Co. | 7601-90-3    |
| 2,4-Pentanedione                             | 114.14           | Lancaster                       | 815-57-6     |

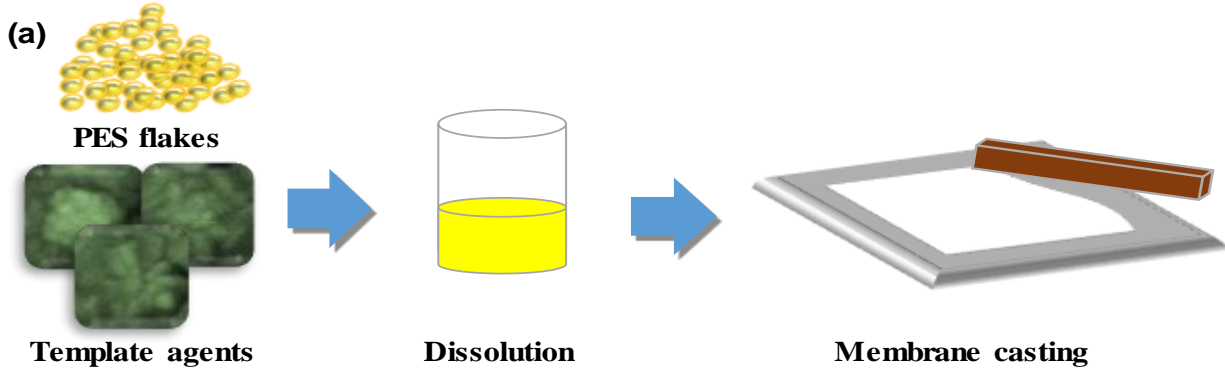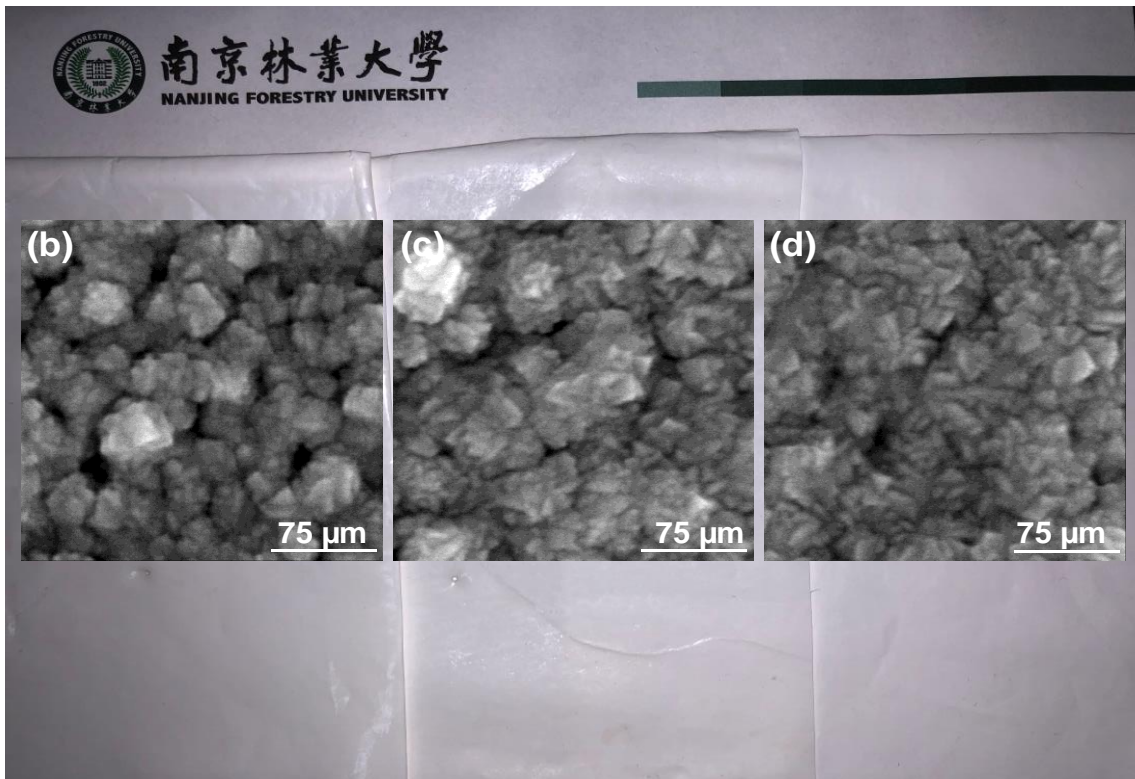

Figure A.1. a) Scheme for preparation of membrane b-d) digital image of membrane and morphological effect of IM22, PEG and F127, respectively.

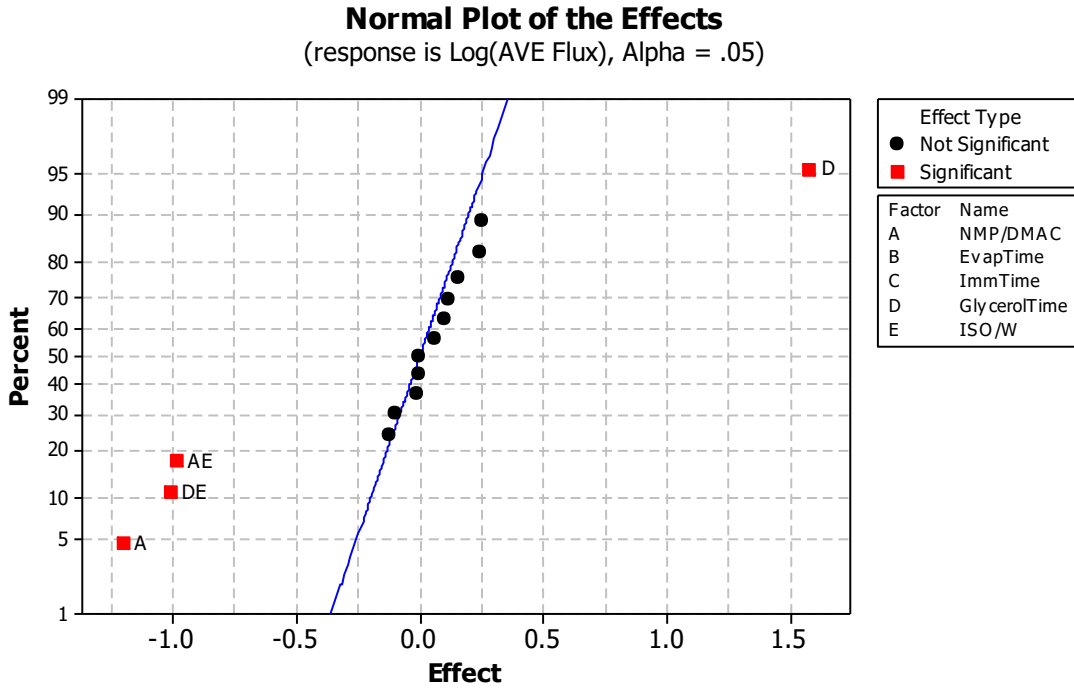

Figure A.2 Normal probability plot of estimated effects and interactions on flux

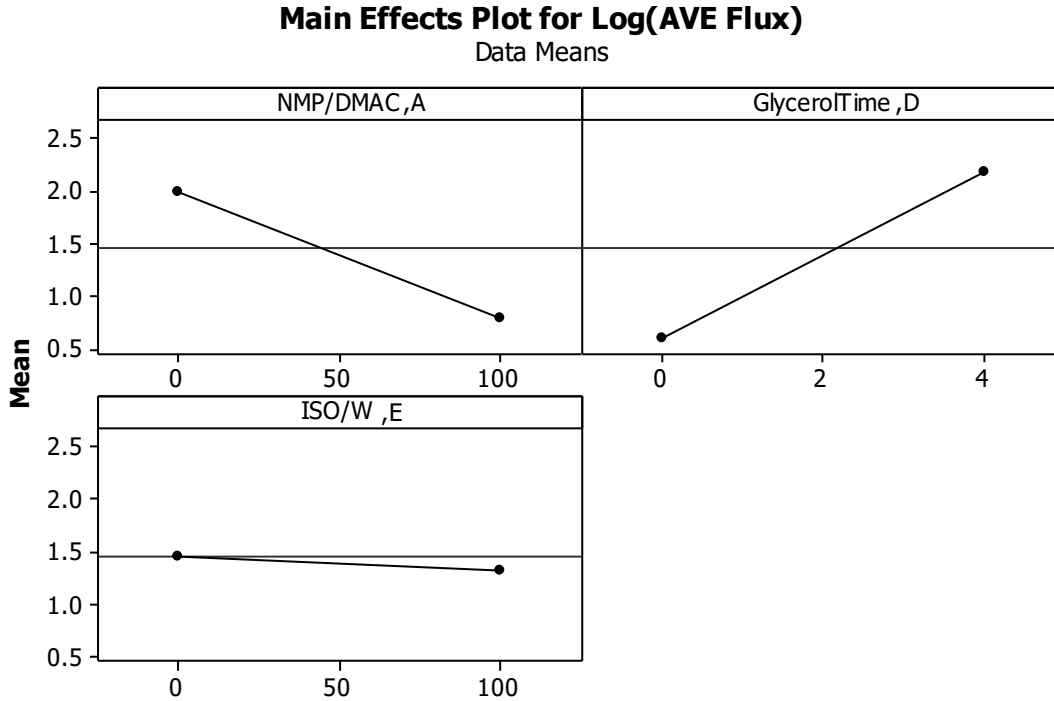

Figure A.3 Main effects plots of response (Log (Flux))

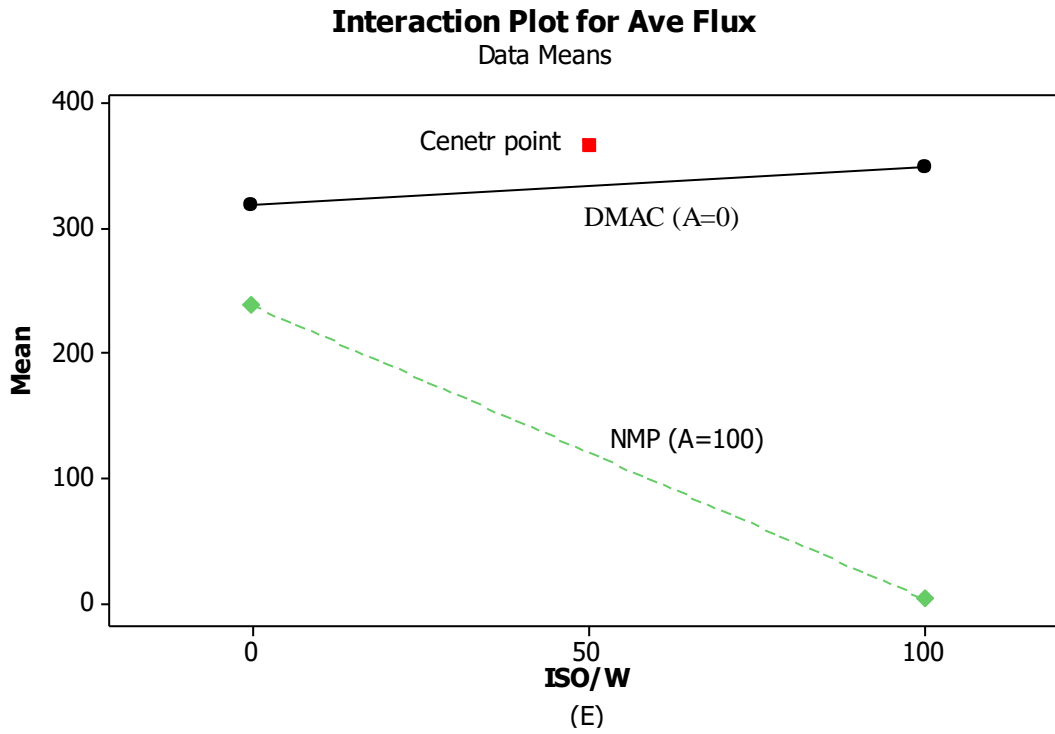

Figure A.4 The interaction of A and E on average Flux

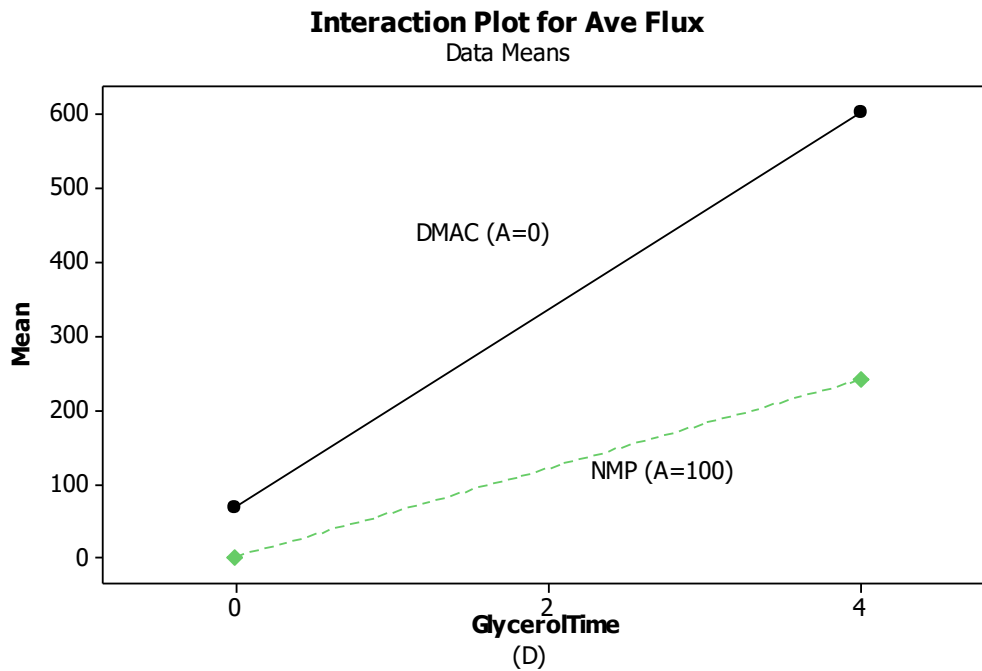

Figure A.5 The interaction of A and D on average Flux

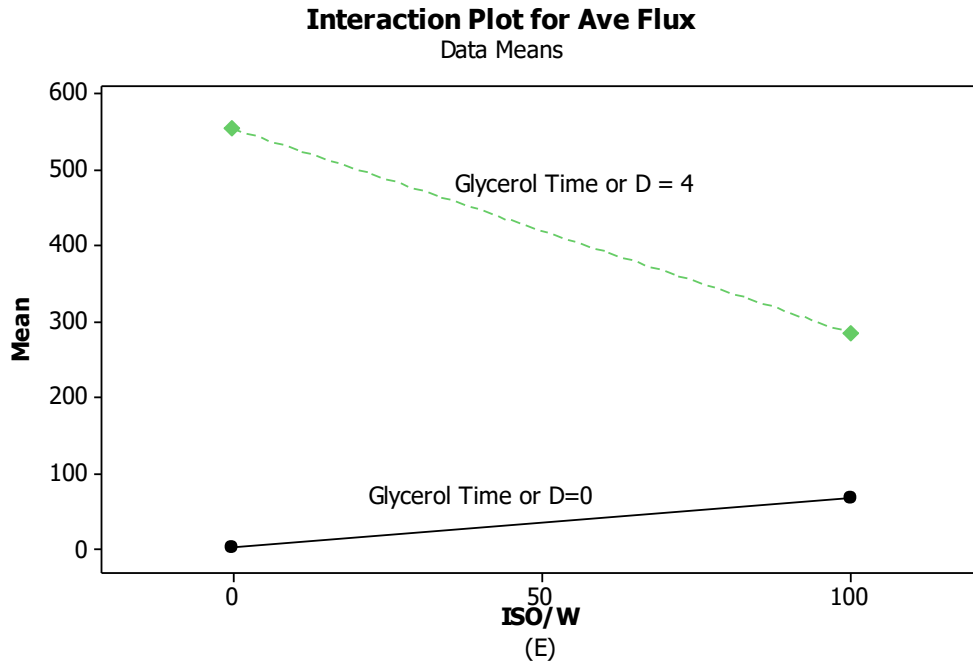

Figure A.6 The interaction of D and E on average Flux

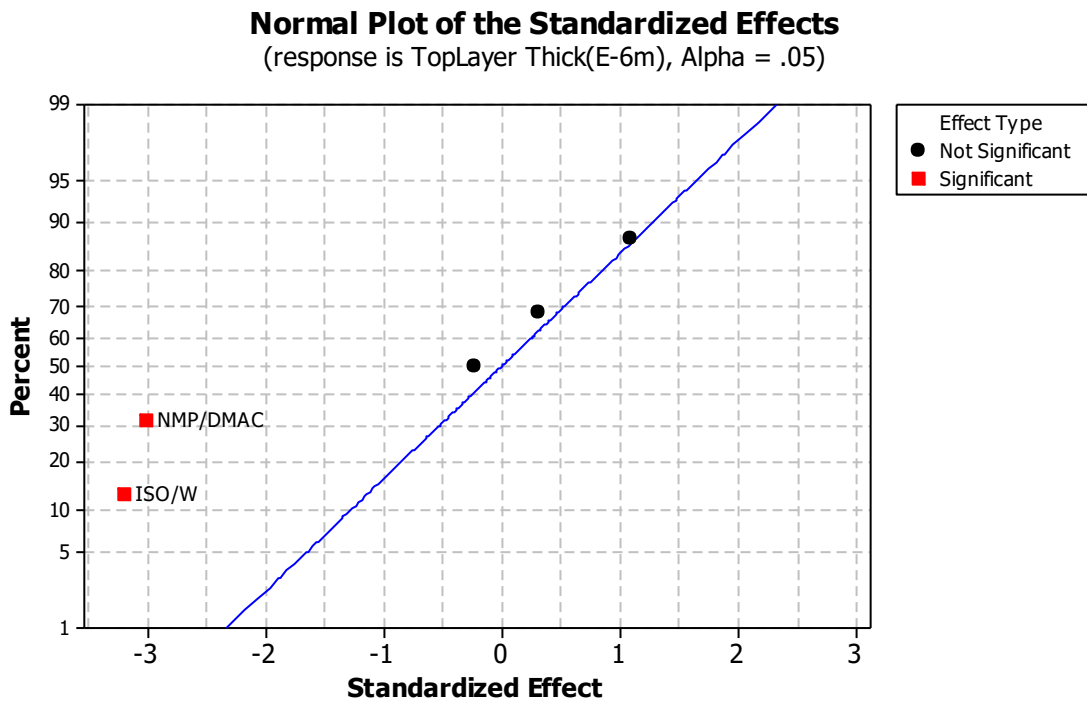

Figure A.7 Normal probability plot of estimated main effects on Top layer thickness

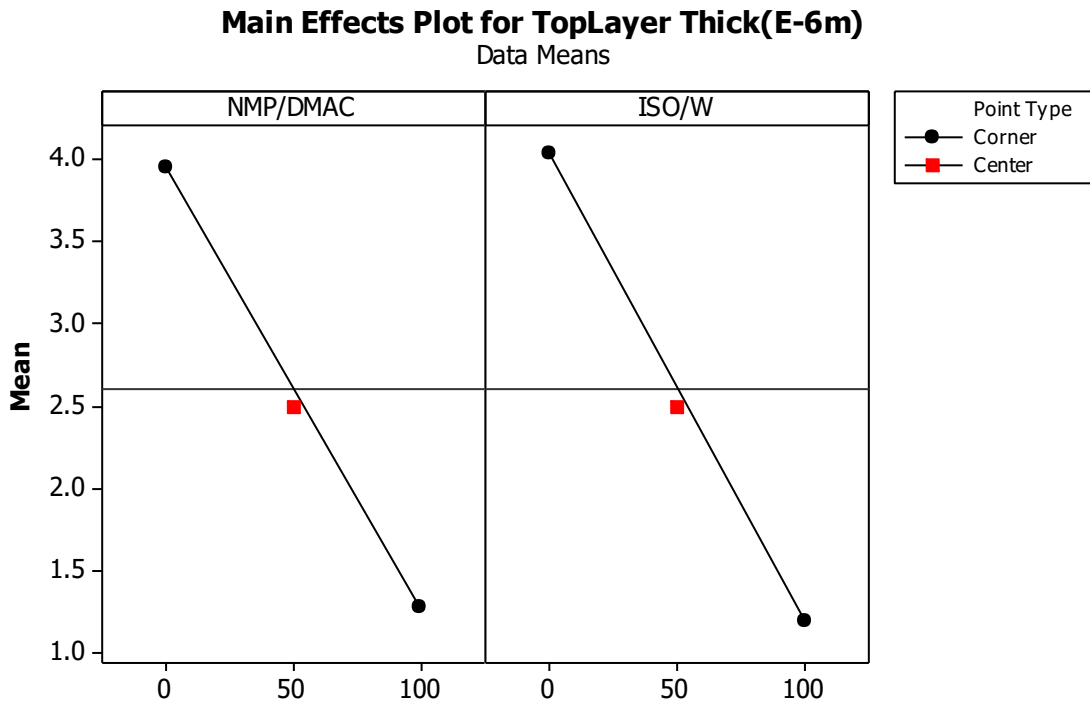

Figure A.8 Main effects plots of response (Top layer thickness)

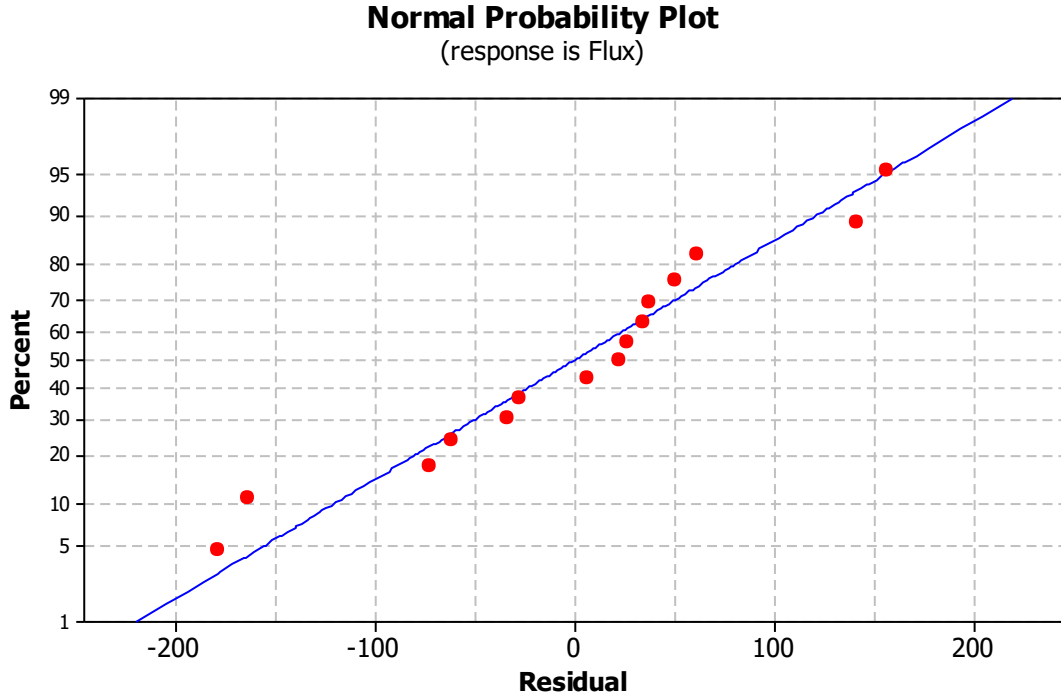

Figure A.9 Normal probability plot of residuals

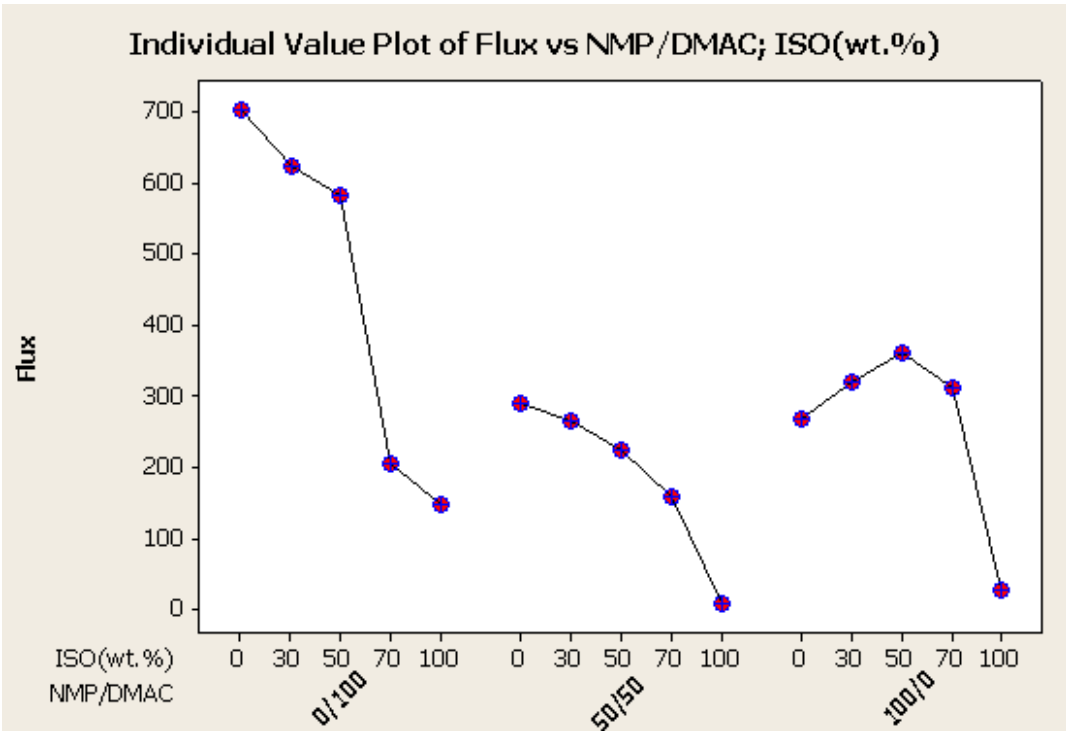

Figure A.10 Individual value plot of Flux (LMH) versus factors A and E

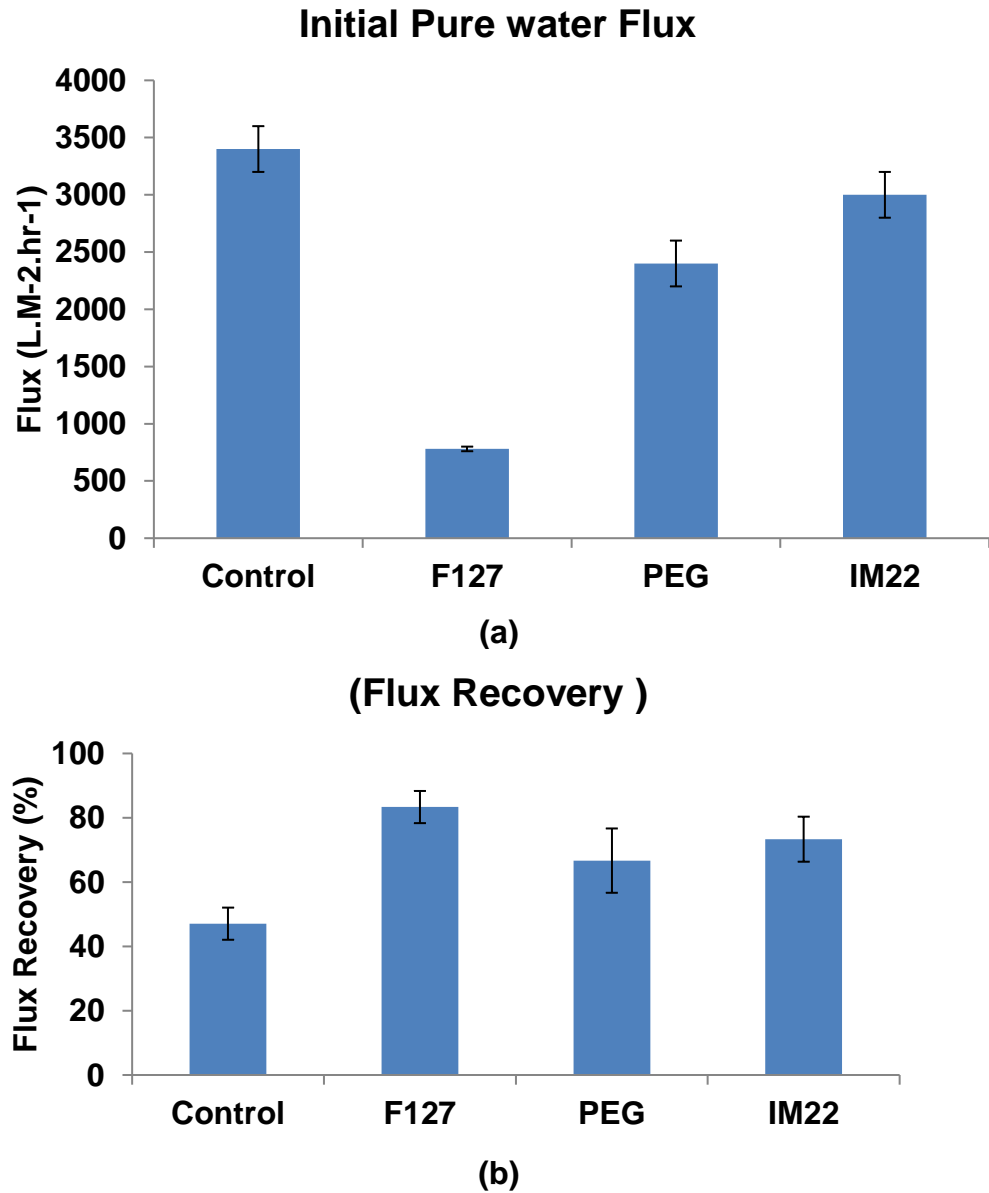

Figure A.11 (a) shows the pure water flux and flux recovery (b) of the membranes. As can be seen in the figure, the best surfactant to minimize the membrane fouling was F127.
